# Supplementary material for: Ice-sheet configuration in the CMIP5/PMIP3 Last Glacial Maximum experiments
Source: Copernicus journal article supplement (doi:10.5194/gmd-8-3621-2015), 2015-11-06
Supplement: Supplementary file 1 [file gmd-8-3621-2015-supplement.zip]

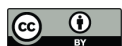

## *Supplement of*

# **Ice-sheet configuration in the CMIP5/PMIP3 Last Glacial Maximum experiments**

**A. Abe-Ouchi et al.**

*Correspondence to:* A. Abe-Ouchi (abeouchi@aori.u-tokyo.ac.jp)

- gmd-8-3621-2015-supplement-title-page.pdf
- pmip3\_21k\_v0.nc
- pmip3\_anu\_lgm\_v0.nc
- pmip3\_glac\_1a\_lgm\_v0.nc
- pmip3\_ice6g\_v2\_lgm\_v0.nc

The copyright of individual parts of the supplement might differ from the CC-BY 3.0 licence.
